## **Mortality prediction in sepsis via gene expression analysis: a community approach**

Timothy E Sweeney<sup>1,2,\*</sup>, Thanneer M Perumal<sup>3,\*</sup>, Ricardo Henao<sup>4,5</sup>, Marshall Nichols<sup>4</sup>, Judith A Howrylak<sup>6</sup>, Augustine M Choi<sup>7</sup>, Jesús F Bermejo-Martin<sup>8</sup>, Raquel Almansa<sup>8</sup>, Eduardo Tamayo<sup>8</sup>, Emma E Davenport<sup>9,10,11</sup>, Katie L Burnham<sup>12</sup>, Charles J Hinds<sup>13</sup>, Julian C Knight<sup>12</sup>, Christopher W Woods<sup>4,14,15</sup>, Stephen F Kingsmore<sup>16</sup>, Geoffrey S Ginsburg<sup>4</sup>, Hector R Wong<sup>17,18</sup>, Grant P Parnell<sup>19</sup>, Benjamin Tang<sup>19-22</sup>, Lyle L Moldawer<sup>23</sup>, Frederick E Moore<sup>23</sup>, Larsson Omberg<sup>3</sup>, Purvesh Khatri<sup>1,2,\*\*</sup>, Ephraim L Tsalik<sup>4,14,15,\*\*</sup>, Lara M Mangravite<sup>3,\*\*</sup>, Raymond J Langle<sup>24,\*\*</sup>

\* These authors contributed equally to this work

\*\* These authors jointly directed this work

### **Affiliations**

1. Stanford Institute for Immunity, Transplantation and Infection, Stanford University School of Medicine, Stanford, CA 94305, USA.
2. Biomedical Informatics Research, Stanford University School of Medicine, Stanford, CA 94305, USA
3. Sage Bionetworks, Seattle, WA 98109, USA.
4. Center for Applied Genomics and Precision Medicine, Department of Medicine, Duke University, Durham, NC 27708, USA.
5. Department of Electrical and Computer Engineering, Duke University, Durham, NC 27708, USA.
6. Division of Pulmonary and Critical Care Medicine, Penn State Milton S. Hershey Medical Center, Hershey, PA, USA.
7. Department of Medicine, Cornell Medical Center, New York, NY 10065, USA.
8. Hospital Clínico Universitario de Valladolid/IECSCYL, Avda Ramón y Cajal 3, 47005 Valladolid, Spain.
9. Department of Medicine, Brigham and Women's Hospital, Harvard Medical School, Boston, USA.
10. Partners Center for Personalized Genetic Medicine, Boston, USA.
11. Program in Medical and Population Genetics, Broad Institute of MIT and Harvard, Cambridge, USA.
12. Wellcome Trust Centre for Human Genetics, University of Oxford, Oxford, UK.
13. William Harvey Research Institute, Barts and The London School of Medicine, Queen Mary University, London, UK.
14. Division of Infectious Diseases and International Health, Department of Medicine, Duke University, Durham, NC 27710, USA.

15. Durham Veteran's Affairs Health Care System, Durham, NC 27705, USA.
16. Rady Children's Institute for Genomic Medicine, San Diego, CA, USA.
17. Division of Critical Care Medicine, Cincinnati Children's Hospital Medical Center and Cincinnati Children's Research Foundation, Cincinnati, OH, 45223, USA.
18. Department of Pediatrics, University of Cincinnati College of Medicine, Cincinnati, OH, 45267, USA.
19. Centre for Immunology and Allergy Research, Westmead Institute for Medical Research, Sydney, Australia.
20. Department of Intensive Care Medicine, Nepean Hospital, Sydney, Australia.
21. Nepean Genomic Research Group, Nepean Clinical School, University of Sydney, Sydney, Australia.
22. Marie Bashir Institute for Infectious Diseases and Biosecurity, Sydney, Australia.
23. Department of Surgery, University of Florida College of Medicine, Gainesville, FL 32610, USA.
24. Department of Pharmacology, University of South Alabama. Mobile, Alabama, USA.

## **Abstract**

Improved risk stratification and prognosis in sepsis is a critical unmet need. Clinical severity scores and available assays such as blood lactate reflect global illness severity with suboptimal performance, and do not specifically reveal the underlying dysregulation of sepsis. Here three scientific groups were invited to independently generate prognostic models for 30-day mortality using 12 discovery cohorts (N=650) containing transcriptomic data collected from primarily community-onset sepsis patients. Predictive performance was validated in 5 cohorts of community-onset sepsis patients (N=189) in which the models showed summary AUROCs ranging from 0.765-0.89. Similar performance was observed in 4 cohorts of hospital-acquired sepsis (N=282). Combining the new gene-expression-based prognostic models with prior clinical severity scores led to significant improvement in prediction of 30-day mortality ( $p<0.01$ ). These models provide an opportunity to develop molecular bedside tests that may improve risk stratification and mortality prediction in patients with sepsis, improving both resource allocation and prognostic enrichment in clinical trials.

## Introduction

Sepsis, recently defined as organ dysfunction caused by a dysregulated host response to infection<sup>1</sup>, contributes to half of all in-hospital deaths in the US and is the leading cost for the US healthcare system<sup>2,3</sup>. Although in-hospital sepsis outcomes have improved over the last decade with standardized sepsis care, mortality rates remain high (10-35%)<sup>4</sup>. Sepsis treatment still focuses on general management strategies including source control, antibiotics, and supportive care. Despite dozens of clinical trials, no treatment specific for sepsis has been successfully utilized in clinical practice<sup>5</sup>. Two consensus papers suggest that continued failure of proposed sepsis therapies is due to substantial patient heterogeneity in the sepsis syndrome and a lack of tools to accurately categorize sepsis at the molecular level<sup>5,6</sup>. Current tools for risk stratification include clinical severity scores such as APACHE or SOFA as well as blood lactate levels. While these measures assess overall illness severity, they do not adequately quantify the patient's dysregulated response to the infection and therefore fail to achieve the personalization necessary to improve sepsis care<sup>7</sup>.

A molecular definition of the severity of the host response in sepsis would provide several benefits. First, improved accuracy in sepsis prognosis would improve clinical care through appropriate matching of patients with resources: the very sick can be diverted to ICU for maximal intervention, while patients predicted to have a better outcome may be safely watched in the hospital ward or discharged early. Second, more-precise estimates of prognosis would allow for better discussions regarding patient preferences and the utility of aggressive interventions. Third, better molecular phenotyping of sepsis patients has the potential to improve clinical trials through both (1) patient selection and prognostic enrichment for drugs and interventions (e.g., excluding patients predicted to have good vs. bad outcomes), and (2) better assessments of observed-to-expected ratios for mortality<sup>5,6</sup>. Finally, as a direct quantitative measure of the dysregulation of the host response, molecular biomarkers could potentially help form a quantitative diagnosis of sepsis as distinct from non-septic acute infections<sup>8,9</sup>. Thus, overall, a quantitative test for sepsis could be a significant asset to clinicians if deployed as a rapid assay.

Previously, a number of studies have used whole-blood transcriptomic (genome-wide expression) profiling to risk-stratify sepsis patients<sup>10-13</sup>. Important insights from these studies suggest that more-severe sepsis is accompanied by an overexpression of neutrophil proteases,

adaptive immune exhaustion, and an overall profound immune dysregulation<sup>10,11,14–17</sup>. Quantitative evaluation of host response profiles based on these observations have been validated prospectively to show specific outcomes<sup>12,13</sup>, but none have yet been translated into clinical practice. Still, the availability of high-dimensional transcriptomic data from these accumulated studies has created unprecedented opportunities to address questions across heterogeneous representations of sepsis (different ages, pathogens, and patient types) that could not be answered by any individual cohort.

Transcription-based modeling has been deployed across many diseases to improve prognostic accuracy. These are typically developed in a method-specific manner using data collected from single cohorts. As a result, prognostic models often lack the generalizability that is necessary to confer utility in clinical applications<sup>18</sup>. In contrast, community modeling approaches (where multiple groups create models using the same training data) can provide an opportunity to explicitly evaluate predictive performance across a diverse collection of prognostic models sampled from across a broad solution space<sup>19–22,23</sup>. Here, we systematically identified a large collection of both public and privately-held gene expression data from clinical sepsis studies at the time of sepsis diagnosis. Three scientific groups were then invited to build models to predict 30-day mortality based on gene expression profiles. These three groups produced four different prognostic models, which were then validated in external validation cohorts composed of patients with either community-acquired sepsis or hospital-acquired infections (HAIs).

## **Materials and Methods**

### *Systematic Search*

Two public gene expression repositories (NCBI GEO<sup>24</sup>, EMBL-EBI ArrayExpress<sup>25</sup>) were searched for all clinical gene expression microarray or next-generation sequencing (NGS / RNAseq) datasets that matched any of the following search terms: sepsis, SIRS, trauma, shock, surgery, infection, pneumonia, critical, ICU, inflammatory, nosocomial. Clinical studies of acute infection and/or sepsis using whole blood were retained. Datasets that utilized endotoxin or LPS infusion as a model for inflammation or sepsis were excluded. Datasets derived from sorted cells (e.g., monocytes, neutrophils) were also excluded.

Overall, 16 studies containing 17 different cohorts were included (Table 1a-b). These 16 studies include expression profiles from both adult<sup>13,15,17,26–35</sup> and pediatric<sup>31,36–39</sup> cohorts. In these cases, the gene expression data were publicly available. When mortality and severity phenotypes were unavailable in the public data, the data contributors were contacted for this information. This included datasets E-MTAB-1548<sup>11,40</sup>, GSE10474<sup>27</sup>, GSE21802<sup>33</sup>, GSE32707<sup>30</sup>, GSE33341<sup>34</sup>, GSE63042<sup>17</sup>, GSE63990<sup>35</sup>, GSE66099<sup>39</sup>, and GSE66890<sup>32</sup>. Furthermore, where longitudinal data was available for patients admitted with sepsis, we only included data derived from the first 48 hours after admission. The E-MTAB-4421 and E-MTAB-4451 cohorts both came from the GAINs study<sup>13</sup>, used the same inclusion/exclusion criteria, and were processed on the same microarray type. Thus, after re-normalizing from raw data, we used ComBat normalization<sup>41</sup> to co-normalize these two cohorts into a single cohort, which we refer to as E-MTAB-4421.51. For this study, data were included only for patients sampled on the day of hospital admission. In addition to the above 17 datasets, we identified four additional privately-held datasets (Table 1c) representing patients with HAI. In-depth summaries of each HAI cohort can be found in the supplementary text.

We selected cohorts as either discovery or validation based on their availability. Studies for which outcome data was readily available were included as discovery cohorts. Only GSE54514<sup>15</sup> was initially held out for validation given its large size and representative patient characteristics. After we had trained the models some outcomes data became newly available, so these were added as validation cohorts<sup>13,33–35</sup>. Additionally, given the known differences in sepsis pathophysiology and gene expression profiles as compared to patients with community-acquired sepsis<sup>39,42</sup>, the HAI datasets were set aside as a second validation cohort. The validation cohorts were not matched to the discovery cohort on any particular criteria but rather provide a validation opportunity across a heterogeneous range of clinical scenarios.

### *Gene Expression Normalization*

All Affymetrix datasets were downloaded as CEL files and re-normalized using the gcRMA method (R package *affy*<sup>43</sup>). Output from other array types were normal-exponential background corrected and then between-arrays quantile normalized (R package *limma*<sup>44</sup>). For all gene analyses, the mean of probes for common genes was set as the gene expression level. All probe-to-gene mappings were downloaded from GEO from the most current SOFT files.

Two of the cohorts, CAPSOD<sup>17</sup> and the Duke HAI cohort, were assayed via NGS. For compatibility with micro-array studies, expression from NGS data sets were downloaded as counts per million total reads (CPM) and were normalized using a weighted linear regression model using the voom method<sup>45</sup> (R package limma<sup>44</sup>). The estimated precision weights of each observation were then multiplied with the corresponding  $\log_2(\text{CPM})$  to yield final gene expression values.

### *Prediction Models*

Prediction models were built by comparing patients who died within 30 days of hospital admission with sepsis to patients who did not. In the CAPSOD dataset (which was used in model training) we excluded two patients with unclear mortality outcomes, and one patient who died in-hospital but after 30 days. Mortality was modeled as a binary variable as since time-to-event data were not available. Overall, a total of four prognostic models were built by three different academic groups (Duke University, Sage Bionetworks, and Stanford University). All four models started with the same gene expression data in the discovery phase. Each model was built in two phases: a feature selection phase based on statistical thresholds for differential gene expression across all discovery cohorts, and then a model construction phase optimizing classification power. Full descriptions of the four models can be found in the supplementary text, and in Supplementary Figures 1-3.

### *Comparison with severity scores*

We compared the prognostic accuracy of the gene scores with the prognostic accuracy of clinical severity scores (APACHE II, PELOD, PRISM, SAPS II, SOFA, and the Denver score) where such information was available. These clinical severity scores were not necessarily built to predict mortality in the specific populations in which they were used here, but nonetheless serve as important comparators for the gene expression models. To compare prognostic power, logistic regression was performed to predict mortality using either the clinical severity score or the given gene model's output score. We then tested a combined model (mortality as a function of clinical severity and gene score, without interaction term) and measured the AUROC of the combined model. Comparisons were made between AUROCs with paired t-tests.

### *Discriminatory Power Analyses*

We examined class discriminatory power for separating survivors from non-survivors using receiver operating characteristic (ROC) curves of the gene scores within datasets. The area under the ROC curves (AUROC) was calculated using the trapezoidal method. Summary ROC curves were calculated via the method of Kester and Buntinx<sup>46,47</sup>. We examined the ability of the models to predict non-survivors using precision-recall curves generated from the gene scores in each examined dataset. Precision-recall curves of the gene scores were constructed within datasets, and the area under the precision-recall curve (AUPRC) was calculated using the trapezoidal method.

### *Enrichment Analysis*

We conducted two analyses to evaluate the functional enrichment of the genes selected as predictors by the four models. This included a targeted enrichment analysis for cell types as previously described<sup>39</sup> and an exploratory enrichment analysis that assessed a large number of functionally annotated gene sets.

In a mixed tissue such as blood, shifts in gene expression can be caused by changes in cell type distribution. To check for this effect, we used gene expression profiles derived from known sorted cell types to determine whether a given set of genes is enriched for genes represented in a specific cell type. In each curated cell type vector, a ‘score’ is calculated by the geometric mean of the upregulated genes minus the geometric mean of the downregulated genes. A higher ‘score’ represents a greater presence of the given cell type in the differential gene expression signature.

For exploratory enrichment, we curated thousands of gene sets from two widely-used databases: gene ontology (GO)<sup>48</sup> and the Reactome database of pathways and reactions in human biology<sup>49,50</sup>. Our 12 discovery cohorts had approximately 6,000 genes in common, which formed a ‘background’ set of genes. We removed all genes not in the background genes from the Reactome/GO sets. We then retained all Reactome/GO gene sets containing at least 10% and at least 3 genes overlapping with the predictor genes. The remaining Reactome/GO gene sets were removed to reduce the multiple testing burden. Fisher’s Exact test was used to test enrichment in each of the curated reference gene sets. Both nominal and Benjamini-Hochberg-corrected significance were tested.



## *Statistics and R*

All computation and calculations were carried out in the R language for statistical computing (version 3.2.0) and Matlab R 2016a (The MathWorks, Inc.). Significance levels for p-values were set at 0.05 and analyses were two-tailed.

## **Results**

### *Analysis Overview*

We used a community approach to build gene-expression-based models predictive of sepsis-induced mortality using all available gene expression datasets (21 total cohorts, Table 1). In this community approach, three different teams (Duke University, Sage Bionetworks, and Stanford University) performed separate analyses using the same input data; we thus sampled the possible model space to determine whether output performance is a function of analytical approaches (Figure 1). Two models (Duke and Stanford) used parameter-free difference-of-means formulae for integrating gene expression, and the other two models (both from Sage Bionetworks) used penalized logistic regression (LR)<sup>51</sup> and random forests (RF)<sup>52</sup> (Supplementary Text).

Each of the four models was trained using 12 discovery cohorts (485 survivors and 157 non-survivors) composed primarily of patients with community-acquired sepsis. Performance was evaluated across two groups of heterogeneous validation data sets (5 community-acquired sepsis cohorts with 161 survivors and 28 non-survivors and 4 HAI cohorts with 258 survivors and 24 non-survivors, Table 1). The community-acquired sepsis and HAI cohorts were considered separately in validation because of their known differences in host-response profiles. Due to the nature of public datasets, we had limited information on demographics, infection, severity and treatment and so these variables were not controlled for in model selection. The cohorts included patients from multiple age groups, countries, and hospital wards (emergency department, hospital ward, medical ICU, and surgical ICU). As expected in varied patient populations, mortality rates varied widely across cohorts (mean 23.2%  $\pm$  13.4%).

### *Prognostic Power Assessments*

Model performance was primarily evaluated using ROC analysis separately in the discovery, validation, and HAI cohorts. Boxplots of the AUROCs for each model are shown in Figure 2; data from individual cohorts and summary ROC curves are shown in Supplementary Tables 1-2 and Supplementary Figure 4. Across the five community-acquired sepsis validation datasets, the four models showed generally preserved prognostic power, with summary AUROCs ranging from 0.75 (95% CI 0.63-0.84, Sage LR) to 0.89 (95% CI 0.56-0.99, Stanford). Three of the four models performed well in classifying the HAI datasets (summary AUROCs 0.81-0.87 in the Duke, Sage LR, and Stanford models); one model performed poorly in HAI (summary AUROC 0.52, 95% CI 0.36-0.68, Sage RF). Overall, most models performed equivalently in discovery, validation, and HAI datasets. To judge other performance metrics including accuracy, specificity, NPV and PPV, we set thresholds for each model at the nearest sensitivity >90% (Supplementary Figure 5).

To assess whether the models contained complementary orthogonal information, we evaluated the prediction accuracy of an ensemble model based on the predictions of all four individual models (see Supplementary Methods). The prognostic power of the ensemble model was at an average AUROC of 0.81 across all five validation data sets (paired t-tests vs. individual models all  $p=NS$ , Supplementary Table 3) indicating that the present diagnostic accuracy may be a rough estimate of the ceiling of prognostic accuracy inherent in these data.

Performance in predicting non-survivors was evaluated using the area under the precision-recall curve (AUPRC) (Figure 2b & Supplementary Table 4). The AUPRCs for non-survivor prediction were notably lower than the AUROCs, suggesting that the models' primary utility may be in ruling out mortality for individuals much less likely to die within 30 days (those less likely to require substantial intervention) as opposed to accurately identifying the minority of patients who are highly likely to die within 30 days. On the contrary the AUPRC of the ensemble model was averaged at 0.428 in validation cohorts (Supplementary Table 3), suggesting complementarity in discriminatory power between individual models.

### *Comparison to Standard Predictors*

We next assessed whether the performance of these gene expression-based predictors of mortality outperformed standard clinical severity scores. Notably, clinical measures of severity were only available in a subset of cohorts (8 discovery, 3 validation, 3 HAI; Supplemental Table

5). The mean differences in the AUROCs of the gene model over clinical severity scores were: Duke -0.044; Sage LR 0.010; Sage RF 0.094; Stanford 0.064; only the Stanford model trended towards significance (paired t-test  $p = 0.098$ ). However, we combined gene models and clinical severity scores into joint predictors, and each combination significantly outperformed clinical severity scores alone (all paired t-tests  $p \leq 0.01$ ). This suggests that the gene expression-based predictors add significant prognostic utility to standard clinical metrics.

### *Comparison Across Models*

We next studied whether models were correctly classifying the same patients or whether each model was correctly classifying different groups of patients. We tested model correlations across all patients by comparing the relative ranks of each patient within each model instead of comparing raw model scores. We found the models were moderately correlated (Spearman rho = 0.35 – 0.61, Supplemental Figure 6). We then evaluated the agreement between the four models by comparing model-specific patient classifications (Supplementary Table 6). For this purpose, we chose cutoffs for each model that yielded 90% sensitivities for non-survivors. We then labeled patients as being either always misclassified, correctly classified by 1 or 2 models (no consensus), or correctly classified in at least 3 of 4 models (consensus). As expected by the 90% sensitivity threshold, 10% of patients were misclassified by all models. In the remaining cases, 63% were correctly predicted by consensus and 27% do not reach consensus. Together, the model correlation and consensus analyses showed that 73% of patients were classified by at least one model, with variance leading to discordance in the remaining 27%.

### *Biology of the Gene Signatures of Mortality*

Gene predictors were chosen for both optimized prognostic power and sparsity in our data-driven approach and so do not necessarily represent key nodes in the pathophysiology of sepsis. Still, we examined whether interesting biology was being represented in the models. We first looked for overlap in the gene sets used for prediction across the four models, but found few genes in common (Table 2). Since each signature had too few genes for robust analysis, we analyzed the genes from all four models in aggregate, resulting in 58 total genes (31 up-regulated and 27 down-regulated, Supplementary Table 7).

First, we studied whether the differential gene expression identified may be indicative of cell-type shifts in the blood. The pooled gene sets were tested in several known *in vitro* gene expression profiles of sorted cell types to assess whether gene expression changes are due to cell type enrichment (Supplemental Figure 7). No significant differences were found, but the trend showed an enrichment of M1-polarized macrophages and band cells (immature neutrophils), and underexpression in dendritic cells. This is consistent with a heightened pro-inflammatory response and a decrease in adaptive immunity in patients who ultimately progress to mortality<sup>10</sup>.

We next tested the 58 genes for enrichment in gene ontologies and Reactome pathways, but after multiple hypothesis testing corrections, no pathways were significantly enriched. This may be either due to the relatively low number of genes in the predictor set, or it may indicate that there is not unified biology across the four models. In addition, the models were generated in a way that penalized the inclusion of genes that were redundant for classification purposes. However, since genes redundant for classification purposes are often from the same biological pathway, their exclusion from the models limits the utility of enrichment analyses. Pathways at a nominal enrichment (p value  $\leq 0.05$ ) are shown in Supplementary Table 8. A brief examination of pathways marginally activated in non-survivors showed cell division, apoptosis, hypoxia, and metabolic networks. Pathways marginally activated in survivors included pro-inflammatory and metabolic networks.

## Discussion

Sepsis is a heterogeneous disease, including a wide possible range of patient conditions, pre-existing comorbidities, severity levels, infection incubation times, and underlying immune states. Many investigators have hypothesized that molecular profiling of the host response may better predict sepsis outcomes. Here, we extensively assessed the predictive performance of whole-blood gene expression using a community-based modeling approach. This approach was designed to evaluate predictive capabilities in a manner that was independent of specific methodological preferences, and instead created robust prognostic models across a broad solution space. We developed four state-of-the-art data-driven prognostic models using a comprehensive survey of available data including 21 different sepsis cohorts (both community-acquired and hospital-acquired, N=1,113 patients), with summary AUROCs around 0.85 for predicting 30-day mortality. We also showed that combining the gene-expression-based models

with clinical severity scores leads to significant improvement in the ability to predict 30-day mortality, indicating clinical utility.

Prediction of outcomes up to 30 days after the time of sampling represents a difficult task, given that the models must account for all interventions that occur as part of the disease course. An accuracy of 100% is likely not only unachievable but also undesirable, as it would suggest that mortality is pre-determined and independent of clinical care. Given this background, and since similar prognostic power was observed across all individual models and the ensemble model, our prognostic accuracy may represent an upper bound on transcriptomic-based prediction of sepsis outcomes. In addition, since prognostic accuracy was retained across broad clinical phenotypes (children and adults, with bacterial and viral sepsis, with community-acquired and hospital-acquired infections, from multiple institutions around the world) the models appear to have successfully incorporated the broad clinical heterogeneity of sepsis.

Sepsis remains difficult to define. The most recent definition of sepsis (Sepsis-3) requires the presence organ dysfunction as measured by an increase in SOFA of two or more points over baseline<sup>1</sup>. Determining the SOFA score can help guide which organ systems are dysfunctional, but this fails to characterize the biological changes are driving the septic response. Molecular tools like the ones developed here provide an opportunity to provide a simple, informative prognosis for sepsis by improving patient risk stratification. Host response profiles could also help to classify patients with sepsis as opposed to non-septic acute infections. Identifying such high-risk patients may also lead to greater success in clinical trials through improved enrichment strategies. This identification of subgroups or ‘endotypes’ of sepsis has already been successfully applied to both pediatric and adult sepsis populations<sup>12,13</sup>.

The goal of this study was to generate predictive models but not necessarily to define sepsis pathophysiology. However, our community approach identified a large number of genes associated with sepsis mortality that may point to underlying biology. The association with immature neutrophils and inflammation in sepsis has been previously shown<sup>53</sup>. Results of this study confirm this finding as we note increases in the neutrophil chemoattractant IL-8 as well as neutrophil-related antimicrobial proteins (*DEFA4*, *BPI*, *CTSG*, *MPO*). These azurophilic granule proteases may indicate the presence of very immature neutrophils (metamyelocytes) in the blood<sup>54</sup>. Many of these genes have also been noted in the activation of neutrophil extracellular traps (NETs)<sup>55,56</sup>. NET activation leads to NETosis, a form of neutrophil cell death that can harm

the host<sup>56</sup>. Whether these involved genes are themselves harmful or are markers of a broader pathway is unknown. Along with immune-related changes, there are changes in genes related to hypoxia and energy metabolism (*HIF1A*, *NDUFV2*, *TRIB1*). Of particular interest is the increase in *HIF1A*, a hypoxia-induced transcription factor. This upregulation is corroborated by previous findings in patients with higher early mortality in the larger E-MTAB-4421.51 cohort<sup>13</sup>. This may be evidence of either a worsening cytopathic hypoxia in septic patients who progress to mortality, or of a shift away from oxidative metabolism (“pseudo-Warburg” effect), or both<sup>57</sup>. Modification of the Warburg effect due to sepsis has been implicated in immune activation<sup>58,59</sup>, trained immunity<sup>60</sup>, and immunoparalysis<sup>61</sup>.

The present study has several limitations. First, as a retrospective study of primarily publically available data, we are not able to control for demographics, infection, patient severity, or individual treatment. However, our successful representation of this heterogeneity likely contributed to the successful validation in external community-acquired and hospital-acquired sepsis cohorts. Second, despite a large amount of validation data, we do not present the results of any prospective clinical studies of these biomarkers. Prospective analysis will be paramount in translating the test to a clinically relevant assay. Third, the genes identified here were specifically chosen for their performance as biomarkers, not based on known relevance to the underlying pathophysiology of mortality in sepsis. As such, the biological insights gained from these biomarkers will need to be confirmed and expanded on by studies focused on the entire perturbation of the transcriptome during sepsis and through targeted study of individual genes and pathways. Fourth, the use of 30-day mortality as our endpoint is a crude measure of severity, and may miss important intermediate endpoints such as prolonged ICU stay or poor functional recovery. While such intermediate outcomes were not available in the current data, the models’ abilities to predict these functional outcomes will need to be tested prospectively.

Researchers, clinicians, funding agencies, and the public are all advocating for improved platforms and policies that encourage sharing of clinical trial data<sup>62</sup>. Meta-analysis of multiple studies leads to results that are more reproducible than from similarly-powered individual cohorts (PMID: 27634930). The community approach used here has shown that aggregated transcriptomic data can be used to define novel prognostic models in sepsis. This collaboration of multidisciplinary teams of experts encompassed both analytical and statistical rigor along with deep understandings of both the transcriptomics data and clinical data. To advance beyond the

work presented here, more data must be made available, including demographics, treatments, and clinical outcomes, as well as other data types like proteomics and metabolomics. Data-driven collaborative modelling approaches using these data can be effective in discovering new clinical tools.

## **Conclusions**

We have shown comprehensively that patients with sepsis can be risk-stratified based on their gene expression profiles at the time of diagnosis. The overall performance of expression-based predictors paired with clinical severity scores was significantly higher than clinical scores alone. These gene expression models reflect a patient's underlying biological response state and could potentially serve as a valuable clinical assay for prognosis and for defining the host dysfunction responsible for sepsis. These results serve as a benchmark for future prognostic model development and as a rich source of information that can be mined for additional insights. Improved methods for risk stratification would allow for better resource allocation in hospitals and for prognostic enrichment in clinical trials of sepsis interventions. Ultimately, prospective clinical trials will be needed to confirm and extend the findings presented here.

## **List of Supplementary Materials**

Supplemental Text

Supplementary Table 1: Summary AUROCs for genomic models

Supplementary Table 2: Individual AUROCs for genomic models

Supplementary Table 3: Ensemble model performance characteristics

Supplementary Table 4: AUPR for genomic models (Individual cohorts)

Supplementary Table 5: AUROC with genomic features and clinical severity

Supplementary Table 6: Agreement between models

Supplementary Table 7: Genomic features of sepsis mortality (intersection from all models)

Supplementary Table 8: Nominally enriched pathways

Supplemental Figure 1: Schematic of workflow of discovery of Duke model

Supplemental Figure 2: Schematic workflow of discovery of Sage LR and Sage RF models

Supplemental Figure 3: Schematic of workflow of discovery of Stanford model

Supplemental Figure 4: Model performance showing individual ROC curves and summary ROC



curve with confidence intervals (black and grey).

Supplemental Figure 5: Boxplots of other performance metrics for each model in individual cohorts, with cutoffs set to the sensitivity nearest to 90%.

Supplemental Figure 6: Rank order correlation between sample scores across the four models for all samples.

Supplemental Figure 7: Cell type enrichments of the entire set of 58 genes used across all four prediction models.

## References

1. Singer, M. *et al.* The Third International Consensus Definitions for Sepsis and Septic Shock (Sepsis-3). *JAMA* **315**, 801 (2016).
2. Torio, C. M. (ahrq) & Andrews, R. M. (ahrq). National Inpatient Hospital Costs: The Most Expensive Conditions by Payer, 2011. HCUP Statistical Brief #160. (2013).
3. Liu, V. *et al.* Hospital Deaths in Patients With Sepsis From 2 Independent Cohorts. *JAMA* (2014). doi:10.1001/jama.2014.5804
4. Kaukonen, K. M., Bailey, M., Pilcher, D., Cooper, D. J. & Bellomo, R. Systemic inflammatory response syndrome criteria in defining severe sepsis. *N. Engl. J. Med.* **372**, 1629–1638 (2015).
5. Opal, S. M., Dellinger, R. P., Vincent, J. L., Masur, H. & Angus, D. C. The next generation of sepsis clinical trial designs: what is next after the demise of recombinant human activated protein C?\*. *Crit. Care Med.* **42**, 1714–1721 (2014).
6. Cohen, J. *et al.* Sepsis: a roadmap for future research. *Lancet Infect. Dis.* **15**, 581–614 (2015).
7. Shankar-Hari, M. *et al.* Developing a New Definition and Assessing New Clinical Criteria for Septic Shock: For the Third International Consensus Definitions for Sepsis and Septic Shock (Sepsis-3). *JAMA* **315**, 775–787 (2016).
8. Abraham, E. New Definitions for Sepsis and Septic Shock: Continuing Evolution but With Much Still to Be Done. *JAMA* **315**, 757–759 (2016).
9. Bermejo-Martin, J. F., Tamayo, E., Andaluz-Ojeda, D., Fernández, M. M.- & Almansa, R. Characterising Systemic Immune Dysfunction Syndrome (SIDS) to fill in the gaps of SEPSIS-2 and SEPSIS-3 definitions. *Chest (Accepted)*
10. Sweeney, T. E. & Wong, H. R. Risk Stratification and Prognosis in Sepsis: What Have We Learned from Microarrays? *Clin. Chest Med.* **37**, 209–218 (2016).
11. Almansa, R. *et al.* Transcriptomic correlates of organ failure extent in sepsis. *J. Infect.* **70**, 445–456 (2015).
12. Wong, H. R. *et al.* Developing a clinically feasible personalized medicine approach to



- pediatric septic shock. *Am. J. Respir. Crit. Care Med.* **191**, 309–315 (2015).
13. Davenport, E. E. *et al.* Genomic landscape of the individual host response and outcomes in sepsis: a prospective cohort study. *Lancet Respir Med* (2016). doi:10.1016/S2213-2600(16)00046-1
  14. Parnell, G. *et al.* Aberrant cell cycle and apoptotic changes characterise severe influenza A infection--a meta-analysis of genomic signatures in circulating leukocytes. *PLoS One* **6**, e17186 (2011).
  15. Parnell, G. P. *et al.* Identifying key regulatory genes in the whole blood of septic patients to monitor underlying immune dysfunctions. *Shock* **40**, 166–174 (2013).
  16. Wong, H. R. *et al.* Genome-level expression profiles in pediatric septic shock indicate a role for altered zinc homeostasis in poor outcome. *Physiol. Genomics* **30**, 146–155 (2007).
  17. Tsalik, E. L. *et al.* An integrated transcriptome and expressed variant analysis of sepsis survival and death. *Genome Med.* **6**, 111 (2014).
  18. Bolignano, D. *et al.* Prognostic models in the clinical arena. *Aging Clin. Exp. Res.* **24**, 300–304 (2012).
  19. Guinney, J. *et al.* Prediction of overall survival for patients with metastatic castration-resistant prostate cancer: development of a prognostic model through a crowdsourced challenge with open clinical trial data. *Lancet Oncol.* (2016). doi:10.1016/S1470-2045(16)30560-5
  20. Sieberts, S. K. *et al.* Crowdsourced assessment of common genetic contribution to predicting anti-TNF treatment response in rheumatoid arthritis. *Nat. Commun.* **7**, 12460 (2016).
  21. Allen, G. I. *et al.* Crowdsourced estimation of cognitive decline and resilience in Alzheimer's disease. *Alzheimers. Dement.* **12**, 645–653 (2016).
  22. Noren, D. P. *et al.* A Crowdsourcing Approach to Developing and Assessing Prediction Algorithms for AML Prognosis. *PLoS Comput. Biol.* **12**, e1004890 (2016).
  23. Saez-Rodriguez, J. *et al.* Crowdsourcing biomedical research: leveraging communities as innovation engines. *Nat. Rev. Genet.* **17**, 470–486 (2016).
  24. Barrett, T. *et al.* NCBI GEO: archive for functional genomics data sets--update. *Nucleic Acids Res.* **41**, D991–5 (2013).
  25. Parkinson, H. *et al.* ArrayExpress--a public database of microarray experiments and gene expression profiles. *Nucleic Acids Res.* **35**, D747–50 (2007).
  26. Spence, R. P. *et al.* Validation of Virulence and Epidemiology DNA Microarray for Identification and Characterization of *Staphylococcus aureus* Isolates. *J. Clin. Microbiol.* **46**, 1620–1627 (2008).
  27. Howrylak, J. A. *et al.* Discovery of the gene signature for acute lung injury in patients with sepsis. *Physiol. Genomics* **37**, 133–139 (2009).

28. Pankla, R. *et al.* Genomic transcriptional profiling identifies a candidate blood biomarker signature for the diagnosis of septicemic melioidosis. *Genome Biol.* **10**, R127 (2009).
29. Berdal, J. E. *et al.* Excessive innate immune response and mutant D222G/N in severe A (H1N1) pandemic influenza. *J. Infect.* **63**, 308–316 (2011).
30. Dolinay, T. *et al.* Inflammasome-regulated cytokines are critical mediators of acute lung injury. *Am. J. Respir. Crit. Care Med.* **185**, 1225–1234 (2012).
31. Lill, M. *et al.* Peripheral blood RNA gene expression profiling in patients with bacterial meningitis. *Front. Neurosci.* **7**, 33 (2013).
32. Kangelaris, K. N. *et al.* Increased expression of neutrophil-related genes in patients with early sepsis-induced ARDS. *Am. J. Physiol. Lung Cell. Mol. Physiol.* **308**, L1102–13 (2015).
33. Bermejo-Martin, J. F. *et al.* Host adaptive immunity deficiency in severe pandemic influenza. *Crit. Care* **14**, R167 (2010).
34. Ahn, S. H. *et al.* Gene expression-based classifiers identify *Staphylococcus aureus* infection in mice and humans. *PLoS One* **8**, e48979 (2013).
35. Tsalik, E. L. *et al.* Host gene expression classifiers diagnose acute respiratory illness etiology. *Sci. Transl. Med.* **8**, 322ra11 (2016).
36. Irwin, A. D. *et al.* Novel biomarker combination improves the diagnosis of serious bacterial infections in Malawian children. *BMC Med. Genomics* **5**, 13 (2012).
37. Kwan, A., Hubank, M., Rashid, A., Klein, N. & Peters, M. J. Transcriptional instability during evolving sepsis may limit biomarker based risk stratification. *PLoS One* **8**, e60501 (2013).
38. Raman, S. *et al.* Oxidative phosphorylation gene expression falls at onset and throughout the development of meningococcal sepsis-induced multi-organ failure in children. *Intensive Care Med.* **41**, 1489–1490 (2015).
39. Sweeney, T. E., Shidham, A., Wong, H. R. & Khatri, P. A comprehensive time-course-based multicohort analysis of sepsis and sterile inflammation reveals a robust diagnostic gene set. *Sci. Transl. Med.* **7**, 287ra71 (2015).
40. Almansa, R. *et al.* Transcriptomic evidence of impaired immunoglobulin G production in fatal septic shock. *J. Crit. Care* **29**, 307–309 (2014).
41. Johnson, W. E., Li, C. & Rabinovic, A. Adjusting batch effects in microarray expression data using empirical Bayes methods. *Biostatistics* **8**, 118–127 (2006).
42. Seok, J. *et al.* Genomic responses in mouse models poorly mimic human inflammatory diseases. *Proc. Natl. Acad. Sci. U. S. A.* **110**, 3507–3512 (2013).
43. Gautier, L., Cope, L., Bolstad, B. M. & Irizarry, R. A. affy--analysis of Affymetrix GeneChip data at the probe level. *Bioinformatics* **20**, 307–315 (2004).
44. Ritchie, M. E. *et al.* limma powers differential expression analyses for RNA-sequencing and

- microarray studies. *Nucleic Acids Res.* **43**, e47–e47 (2015).
45. Law, C. W., Yunshun, C., Wei, S. & Smyth, G. K. voom: precision weights unlock linear model analysis tools for RNA-seq read counts. *Genome Biol.* **15**, R29 (2014).
  46. Sweeney, T. E., Braviak, L., Tato, C. M. & Khatri, P. Genome-wide expression for diagnosis of pulmonary tuberculosis: a multicohort analysis. *Lancet Respir Med* **4**, 213–224 (2016).
  47. Kester, A. D. & Buntinx, F. Meta-analysis of ROC curves. *Med. Decis. Making* **20**, 430–439 (2000).
  48. The Gene Ontology Consortium. Gene Ontology Consortium: going forward. *Nucleic Acids Res.* **43**, D1049–D1056 (2014).
  49. Fabregat, A. *et al.* The Reactome pathway Knowledgebase. *Nucleic Acids Res.* **44**, D481–7 (2016).
  50. Milacic, M. *et al.* Annotating cancer variants and anti-cancer therapeutics in reactome. *Cancers* **4**, 1180–1211 (2012).
  51. Friedman, J., Hastie, T. & Tibshirani, R. Regularization Paths for Generalized Linear Models via Coordinate Descent. *J. Stat. Softw.* **33**, 1–22 (2010).
  52. Wright, M. N. & Ziegler, A. ranger: A Fast Implementation of Random Forests for High Dimensional Data in C++ and R. *arXiv [stat.ML]* (2015).
  53. Mathias, B. *et al.* Human Myeloid-derived Suppressor Cells are Associated With Chronic Immune Suppression After Severe Sepsis/Septic Shock. *Ann. Surg.* (2016). doi:10.1097/SLA.0000000000001783
  54. Pham, C. T. N. Neutrophil serine proteases: specific regulators of inflammation. *Nat. Rev. Immunol.* **6**, 541–550 (2006).
  55. Manfredi, A. A., Covino, C., Rovere-Querini, P. & Maugeri, N. Instructive influences of phagocytic clearance of dying cells on neutrophil extracellular trap generation. *Clin. Exp. Immunol.* **179**, 24–29 (2015).
  56. Masuda, S. *et al.* NETosis markers: Quest for specific, objective, and quantitative markers. *Clin. Chim. Acta* **459**, 89–93 (2016).
  57. Nalos, M. *et al.* Transcriptional reprogramming of metabolic pathways in critically ill patients. *Intensive Care Med Exp* **4**, 21 (2016).
  58. Tannahill, G. M. *et al.* Succinate is an inflammatory signal that induces IL-1 $\beta$  through HIF-1 $\alpha$ . *Nature* **496**, 238–242 (2013).
  59. Yang, L. *et al.* PKM2 regulates the Warburg effect and promotes HMGB1 release in sepsis. *Nat. Commun.* **5**, 4436 (2014).
  60. Cheng, S.-C. *et al.* mTOR- and HIF-1 $\alpha$ -mediated aerobic glycolysis as metabolic basis for trained immunity. *Science* **345**, 1250684 (2014).
  61. Liu, T. F. *et al.* Fueling the flame: bioenergy couples metabolism and inflammation. *J.*

*Leukoc. Biol.* **92**, 499–507 (2012).

62. Bierer, B. E., Li, R., Barnes, M. & Sim, I. A Global, Neutral Platform for Sharing Trial Data. *N. Engl. J. Med.* **374**, 2411–2413 (2016).

### **Acknowledgements**

We would like to thank the authors who contributed gene expression data to the public domain that we re-analyzed here. We thank Michael Bauer for helpful discussion of his group's sepsis data. We thank the Glue Grant investigators for sharing their data publically; they are supported in this by NIGMS Glue Grant Legacy Award R24GM102656.

### **Funding Statements**

JFB-M, RA, and ET were supported by Instituto de Salud Carlos III (grants EMER07/050, PI13/02110, PI16/01156).

RJL was supported by the National Center for Advancing Translational Sciences of the National Institutes of Health under award number UL1TR001417. The CAPSOD study was supported by: NIH (U01AI066569, P20RR016480, HHSN266200400064C).

PK is supported by grants from the Bill and Melinda Gates Foundation, and NIAID grants 1U19AI109662, U19AI057229, U54I117925, and U01AI089859, outside the submitted work.

The GAinS study was supported by the National Institute for Health Research through the Comprehensive Clinical Research Network for patient recruitment; Wellcome Trust (Grants 074318 [JCK], and 090532/Z/09/Z [core facilities Wellcome Trust Centre for Human Genetics including High-Throughput Genomics Group]); European Research Council under the European Union's Seventh Framework Programme (FP7/2007-2013) / ERC Grant agreement no. 281824 (JCK), the Medical Research Council (98082 [JCK]); UK Intensive Care Society; and NIHR Oxford Biomedical Research Centre.

Duke HAI study: Supported by a research agreement between Duke University and Novartis Vaccines and Diagnostics, Inc. According to the terms of the agreement, representatives of the sponsor had an opportunity to review and comment on a draft of the manuscript. The authors had full control of the analyses, the preparation of the manuscript, and the decision to submit the manuscript for publication.

University of Florida 'P50' Study: Data were obtained from the Sepsis and Critically Illness Research Center (SCIRC) at the University of Florida College of Medicine, which is supported in part by NIGMS P50 GM111152.

This work was supported by Defense Advanced Research Projects Agency and the Army Research Office through Grant W911NF-15-1-0107. The views expressed are those of the author and do not reflect the official policy or position of the Department of Veterans Affairs, the Department of Defense or the U.S. Government.

**Author contributions:**

Study conception and design: TES, TMP, RH, PK, ELT, LMM, RJL; Contributed materials: MN, JAH, AC, JFBM, RA, ET, EED, KLB, CJH, JCK, CWW, SFK,GSG, HRW, GPP, BT, LLM, FEM, ELT, RJL; Performed the analyses: TES, TMP, RH; drafted manuscript: TES, TMP; critical revision: all authors.

**Competing Interests:**

The ‘Duke’ 18-gene score is the subject of a provisional patent filed by Duke University. The ‘Stanford’ 12-gene score is the subject of a provisional patent filed by Stanford University. TES and PK are co-founders of Inflammatrix, Inc., which has a commercial interest in the ‘Stanford’ 12-gene score.

**Figure Legends:**

Figure 1: Overview of analysis: schema of our community-modelling-based approach to multi-cohort analysis. Three phases are shown, as described in the Methods section: (i) Discovery, (ii) Validation, and (iii) Secondary validation (HAI cohorts).

Figure 2: Model performance of the four genomic mortality predictors as measured by (a) AUROC and (b) AUPRC. The three panels (top, middle, bottom) show boxplots of the performance across all Discovery, Validation, and HAI cohorts.

**Table 1: Datasets included in the analysis.** Unk, unknown data or not available; IQR, interquartile range; std. dev., standard deviation; ED, emergency department; ICU, intensive care unit; MICU, medical ICU; ARDS, acute respiratory distress syndrome; SIRS, systemic inflammatory response syndrome; VAP, ventilator-associated pneumonia.

| <b>1a: Discovery Cohorts</b>  |                |                                                                    |                                                                              |                                 |              |                                |           |            |        |
|-------------------------------|----------------|--------------------------------------------------------------------|------------------------------------------------------------------------------|---------------------------------|--------------|--------------------------------|-----------|------------|--------|
| Accession                     | First Author   | Cohort Description                                                 | Timing of sepsis diagnosis                                                   | Age                             | Sex (% male) | Severity                       | Country   | N Survived | N Died |
| E-MEXP-3567                   | Irwin          | Children with meningococcal sepsis +/- HIV co-infection            | Admission to ED                                                              | 2.0 (IQR 0.6-6.9)               | 55           | unk.                           | Malawi    | 6          | 6      |
| E-MEXP-3850                   | Kwan           | Children w/ meningococcal sepsis                                   | Admission to hospital; sampled at multiple times 0-48 hrs                    | 1.3 (range 0.8-2.0)             | 40           | PELOD; 29.2 (range 11-61)      | UK        | 19         | 5      |
| E-MTAB-1548                   | Almansa        | Adults with sepsis after surgery (EXPRESS study)                   | Average post-operation day 4 (hospital acquired)                             | 69.7 (std. dev. 13.1)           | 67           | APACHE II 17.0 (std. dev. 5.4) | Spain     | 50         | 24     |
| GSE10474                      | Howrylak       | Adults in MICU with sepsis +/- ALI                                 | Admission to ICU                                                             | 57 (std. dev. 4.3)              | 45           | APACHE II 20.7 (std. dev. 1.6) | USA       | 22         | 11     |
| GSE13015a                     | Pankla         | Adults with sepsis, many from burkholderia                         | Within 48 hours of diagnosis; both community-acquired and hospital-acquired. | 54.7 (std. dev. 11.7)           | 54           | unk.                           | Thailand  | 35         | 13     |
| GSE13015b                     |                |                                                                    |                                                                              |                                 |              |                                |           | 8          | 7      |
| GSE27131                      | Berdal         | Adults with severe H1N1 influenza requiring mechanical ventilation | Admission to ICU                                                             | unk.                            | unk.         | SAPS II 29.3 (std.dev. 10.3)   | Norway    | 5          | 2      |
| GSE32707                      | Dolinay        | Adults in MICU with sepsis +/- ARDS                                | Admission to ICU                                                             | 57.1 (std. dev. 14.9)           | 53           | APACHE II 26.7 (std. dev. 8.5) | USA       | 31         | 17     |
| GSE40586                      | Lill           | Infants, children, and adults with bacterial meningitis            | Within 48 hours of hospital admission                                        | 43.4 (range 17 days - 70 years) | unk.         | unk.                           | Estonia   | 19         | 2      |
| GSE63042                      | Tsalik         | Adults with sepsis (CAPSOD study)                                  | Admission to ED                                                              | 59.1 (std. dev. 18.3)           | 59           | APACHE II 16.5 (std. dev. 7.3) | USA       | 76         | 28     |
| GSE66099                      | Wong           | Children in ICU with sepsis/septic shock                           | Admission to ICU                                                             | 3.7                             | 58           | PRISM 15.7                     | USA       | 171        | 28     |
| GSE66890                      | Kangelaris     | Adults in ICU with sepsis +/- ARDS                                 | Admission to ICU                                                             | 63 (std. dev 19)                | 56           | APACHE III 100 (std. dev. 35)  | USA       | 43         | 14     |
| <b>1b: Validation Cohorts</b> |                |                                                                    |                                                                              |                                 |              |                                |           |            |        |
| GSE21802                      | Bermejo-Martin | Adults in ICU with severe H1N1 influenza                           | Within 48 hours of admission to ICU                                          | 43 (std. dev. 11)               | 47           | SOFA 4.1 (std.dev. 3.5)        | Spain     | 7          | 4      |
| GSE33341                      | Ahn            | Adults with 2+ SIRS criteria and bacteremia                        | Within 24 hours of admission to hospital                                     | 58 (range 24-91)                | 61           | unk.                           | USA       | 49         | 2      |
| GSE54514                      | Parnell        | Adults in ICU with sepsis                                          | Admission to ICU                                                             | 61 (std. dev. 16)               | 40           | APACHE II 21 (std. dev. 6)     | Australia | 26         | 9      |
| GSE63990                      | Tsalik         | Adults with bacterial infection plus 2+ SIRS criteria              | Admission to ED                                                              | 49 (range 14-88)                | 50           | unk.                           | USA       | 64         | 6      |
| E-MTAB-4421.51                | Davenport      | Adults with sepsis (GAIN study)                                    | Day of hospital admission                                                    | 64.2 (std. dev. 15.2)           | 55           | APACHE II 18.6 (std. dev. 9.7) | UK        | 15         | 7      |

| <b>1c: Hospital-Acquired Infection Cohorts</b> |                        |                                                            |                    |                       |      |                                  |     |    |    |
|------------------------------------------------|------------------------|------------------------------------------------------------|--------------------|-----------------------|------|----------------------------------|-----|----|----|
| Duke VAP                                       | Tsalik (unpublished)   | Adults who developed ventilator-associated pneumonia (VAP) | Hospital days 1-30 | 58.0 (std. dev. 17.9) | 75   | unk.                             | USA | 60 | 10 |
| Glue Grant Burns                               | Glue Grant authors     | Adults with severe burns (whole blood)                     | Hospital days 1-30 | 14.1 (std. dev. 16.2) | 64   | Denver Score 1.5 (std. dev. 1.7) | USA | 84 | 8  |
| Glue Grant Trauma                              | Glue Grant authors     | Adults with severe traumatic injuries (buffy coat)         | Hospital days 1-30 | 33.2 (std. dev. 10.2) | 74   | MODS 6.4 (std. dev. 3.3)         | USA | 48 | 1  |
| UF P50 12H                                     | Moldawer (unpublished) | Adults with hospital-acquired sepsis                       | Hospital days 1-30 | unk.                  | unk. | SOFA 5.5 (std. dev. 3.9)         | USA | 66 | 5  |

**Table 2: Genomic predictors of sepsis mortality.**

| <b>Model name</b> | <b>Direction of change in patients with mortality</b> | <b>Genomic features</b>                                                                             |
|-------------------|-------------------------------------------------------|-----------------------------------------------------------------------------------------------------|
| <b>Duke</b>       | Up (5 genes)                                          | <i>TRIB1, CKS2, MKI67, POLD3, PLK1</i>                                                              |
|                   | Down (13 genes)                                       | <i>TGFBI, LY86, CST3, CBFA2T3, RCBTB2, TST, CX3CR1, CD5, MTMR11, CLEC10A, EMR3, DHRS7B, CEACAM8</i> |
| <b>Sage LR</b>    | Up (9 genes)                                          | <i>CFD, DDIT4, DEFA4, IFI27, IL1R2, IL8, MAFF, OCLN, RGS1</i>                                       |
|                   | Down (9 genes)                                        | <i>AIM2, APH1A, CCR2, EIF5A, GSTM1, HIST1H3H, NT5E, RAB40B, VNN3</i>                                |
| <b>Sage RF</b>    | Up (13 genes)                                         | <i>B4GALT4, BPI, CD24, CEP55, CTSG, DDIT4, G0S2, MPO, MT1G, NDUFV2, PAM, PSMA6, SEPP1</i>           |
|                   | Down (4 genes)                                        | <i>ABCB4, CTSS, IKZF2, NT5E</i>                                                                     |
| <b>Stanford</b>   | Up (8 genes)                                          | <i>DEFA4, CD163, PER1, RGS1, HIF1A, SEPP1, C11orf74, CIT</i>                                        |
|                   | Down (4 genes)                                        | <i>LY86, TST, OR52R1, KCNJ2</i>                                                                     |

12 Discovery Cohorts:  
Whole Blood,  
Sepsis only,  
48 Hrs since admission

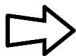

Duke

Sage LR

Sage RF

Stanford

Training

5 Validation Cohorts:  
Whole Blood,  
Sepsis only,  
48 Hrs since admission

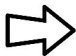

Duke

Sage LR

Sage RF

Stanford

Validation

4 HAI Cohorts:  
Whole Blood,  
Sepsis only,  
24 Hrs since diagnosis

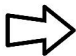

Duke

Sage LR

Sage RF

Stanford

Secondary Validation

Pooled genomic signatures  
of sepsis mortality



2(a) AUROC

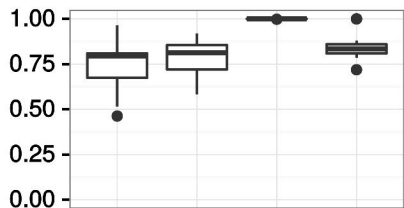

2(b) AUPR

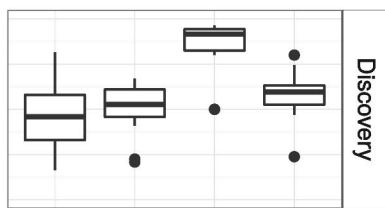

Discovery

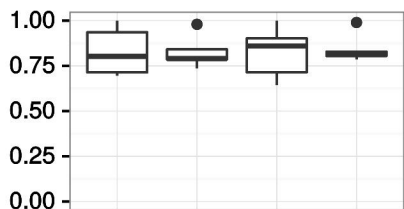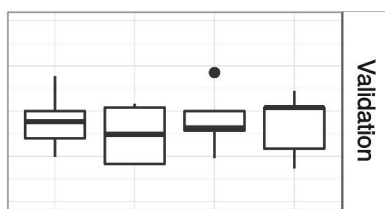

Validation

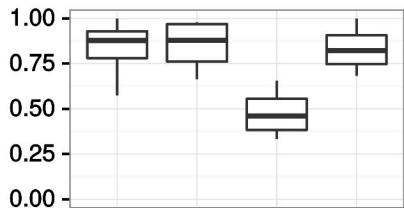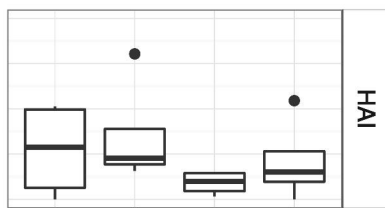

HAI

Model
